# Supplementary material for: Quantitative High-Throughput Identification of Drugs as Modulators of Human Constitutive Androstane Receptor
Source: PubMed Central journal article supplement (PMC4438668; doi:10.1038/srep10405), 2015-05-20
Supplement: srep10405-s1.pdf [file srep10405-s1.pdf]

**Supplementary data to:**

**Quantitative High-Throughput Identification of Drugs as Modulators of Human  
Constitutive Androstane Receptor**

Caitlin Lynch<sup>1</sup>, Jinghua Zhao<sup>2</sup>, Ruili Huang<sup>2</sup>, Jingwei Xiao<sup>1</sup>, Linhao Li<sup>1</sup>, Scott Heyward<sup>3</sup>,  
Menghang Xia<sup>2</sup>, and Hongbing Wang<sup>1\*</sup>

1: Department of Pharmaceutical Sciences, University of Maryland School of Pharmacy,  
Baltimore, Maryland 21201; 2: National Center for Advancing Translational Sciences, National  
Institutes of Health, Bethesda, Maryland 20892; 3: Bioreclamation IVT, Baltimore, Maryland 20

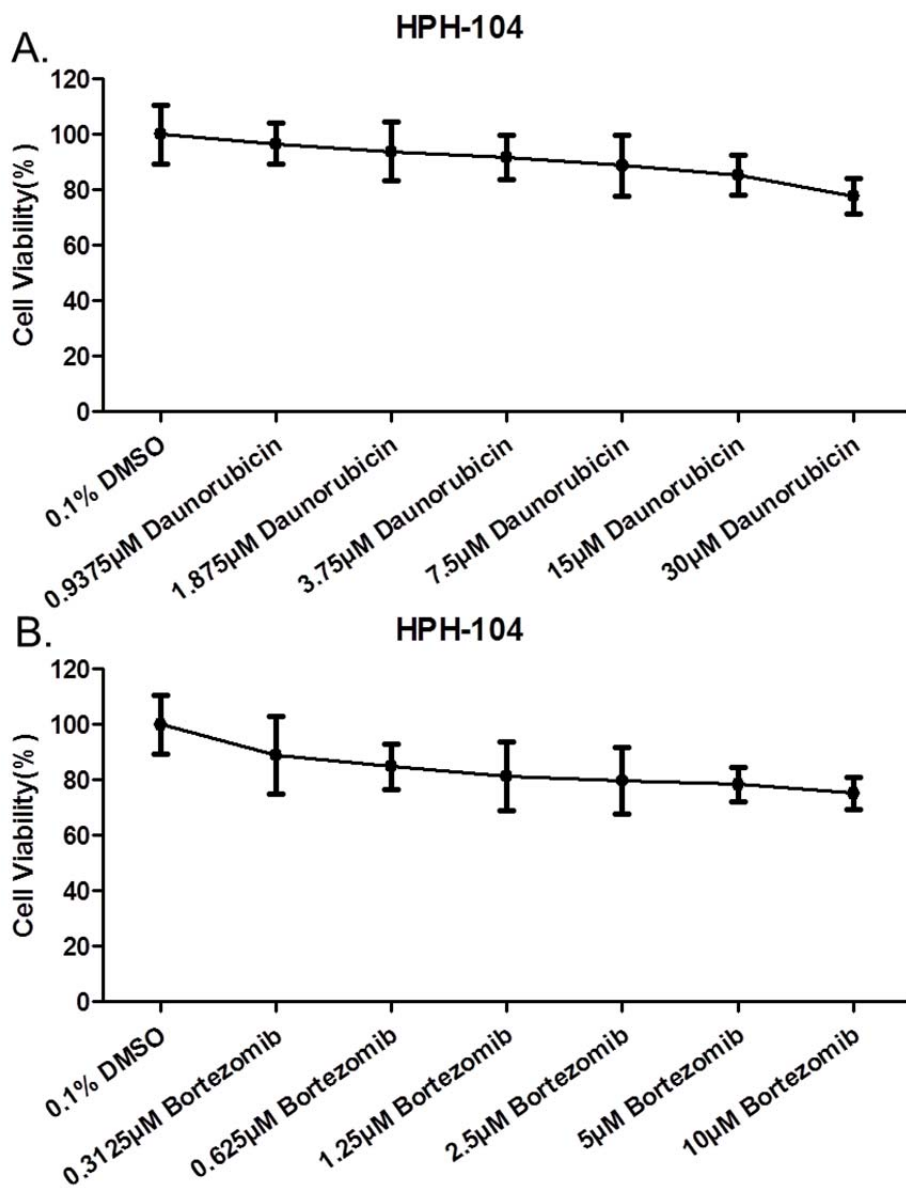

**Figure S1. Cytotoxicity of daunorubicin and bortezomib in HPH.** Human primary hepatocytes (from donor HL-104) cultured in 96-well collagen coated plates were treated with 0.1% DMSO, daunorubicin, or bortezomib at indicated concentrations for 24 hours. MTT assay was carried out following the manufacturer's instruction. Data represent the mean  $\pm$  SD (n =3).

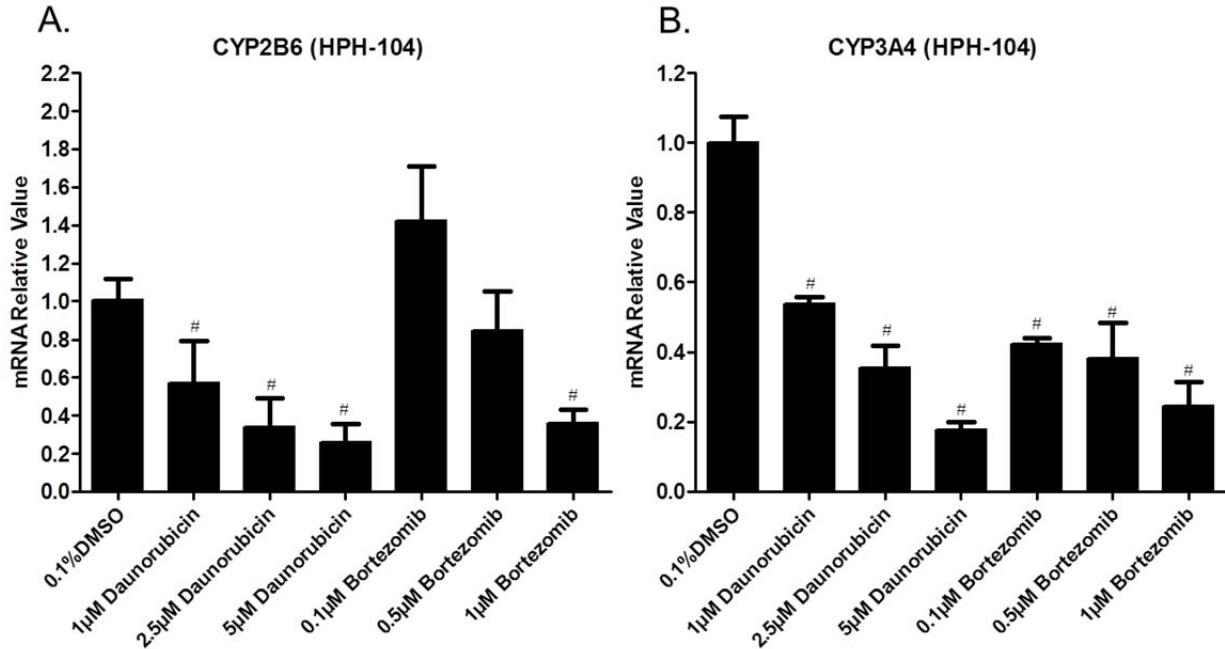

**Figure S2. Effects of daunorubicin and bortezomib on the expression of CYP2B6 and CYP3A4 in HPH.** HPH (from donor HL-104) were treated with the vehicle control (0.1% DMSO), daunorubicin (1, 2.5 and 5 μM), or bortezomib (0.1, 0.5, and 1 μM) for 24 h. Real-time PCR was used to analyze the expression of CYP2B6 (A) and CYP3A4 (B). Data represents the mean ± SD (n=3). #, P < 0.05.
